# Supplementary material for: A genosensor for detecting single-point mutations in dendron chips after blocked recombinase polymerase amplification
Source: Royal Society of Chemistry journal article supplement (doi:10.1039/d2an00160h), 2022-01-01
Supplement: d2an00160h1.pdf [file d2an00160h1.pdf]

## Genosensor for detecting single-point mutations in dendron chip after blocked recombinase polymerase amplification

Sara Martorell<sup>a,b</sup>, Ángel Maquieira<sup>a,b,c</sup>, Luis A. Tortajada-Genaro<sup>\*a,b,c</sup>

<sup>a</sup> Instituto Interuniversitario de Investigación de Reconocimiento Molecular y Desarrollo Tecnológico (IDM), Universitat Politècnica de València, Universitat de València, Camino de Vera s/n, 46022 Valencia, Spain.

<sup>b</sup> Unidad Mixta UPV-La Fe, Nanomedicine and Sensors, IIS La Fe, Valencia, Spain.

<sup>c</sup> Chemistry department, Universitat Politècnica de València, Valencia, Spain.

E-mail: [luitorge@qim.upv.es](mailto:luitorge@qim.upv.es)

### Supplementary Information

#### Table of content

Table S1. List of used oligonucleotides.

Fig. S1: Dendron-mediated chemistry applied to the DNA-probe immobilization on polycarbonate planar surfaces.

Fig. S2: Reference probe immobilization on polycarbonate surfaces.

Fig. S3: Spot signal of hybridization assay depending on the crosslinker concentration in reference chips.

Table S2. Comparison of dendrimer-mediated and dendron-mediated methods for the immobilization of probes

Fig. S4: Study of blocked-RPA conditions

Fig. S5: Study of blocked-RPA conditions

Fig. S6: Mixes of wild-type and mutant genomes

Fig. S7: Analysis of patient samples.

**Table S1.** List of used oligonucleotides. (a) single-strand study, (b) study for the discrimination of single-point mutation.

(a)

| Target | Use         | Sequence 5'-3'                                       |
|--------|-------------|------------------------------------------------------|
| A      | Thiol-probe | TTGCTGATTTTCAACATCAGTCTGATAAGCTA-T <sub>10</sub> -SH |
|        | Amine-probe | GATTTTCAACATCAGTCTGATAAGCTATTTT-NH <sub>2</sub>      |
|        | Target      | TAGCTTATCAGACTGATGTTGAAAATCAGCAA-DIG                 |
| B      | Thiol-probe | TTGCTGATTTTCAACATCAGTCTGATAAGCTA-T <sub>10</sub> -SH |
|        | Amine-probe | GATTTTCAACATCAGTCTGATAAGCTATTTT-NH <sub>2</sub>      |
|        | Target      | CAACGGAATCCCAAAGCAGCTGAAATCAGCAA-DIG                 |
| C      | Thiol-probe | TTGCTGATTTTCAACATCAGTCTGATAAGCTA-T <sub>10</sub> -SH |
|        | Amine-probe | GATTTTCAACATCAGTCTGATAAGCTATTTT-NH <sub>2</sub>      |
|        | Target      | TTAATGCTAATCGTGATAGGGGTAAATCAGCAA-DIG                |

(b)

| Target                 | Use                                                   | Sequence 5'-3'                                        |
|------------------------|-------------------------------------------------------|-------------------------------------------------------|
| <i>PICK3CA</i><br>gene | FP-c                                                  | TTTGGAGTATTTTCATGAAACAAATG                            |
|                        | RP                                                    | DIG-TGTGTGGAAGATCCAATCCATT                            |
|                        | Blocker                                               | TGAATGATGCACATCATGGTGGCT-23ddC                        |
|                        | Wild-type                                             | NH <sub>2</sub> -C6-TTTTTTTTTT-AATGATGCACATCATGGTGGCT |
|                        | p.H1047R                                              | NH <sub>2</sub> -C6-TTTTTTTTTT-ATGATGCACATCATGGTGGC   |
| p.H1047L               | NH <sub>2</sub> -C6-TTTTTTTTTT-AATGATGCACATCATGGTGGCT |                                                       |
| p.H1047P               | NH <sub>2</sub> -C6-TTTTTTTTTT-ATGATGCACATCATGGTGGC   |                                                       |
| Control                | probe                                                 | NH <sub>2</sub> -C6-TTTTTTTTTT-GTTGGAGCTGGTGGCGTAG    |

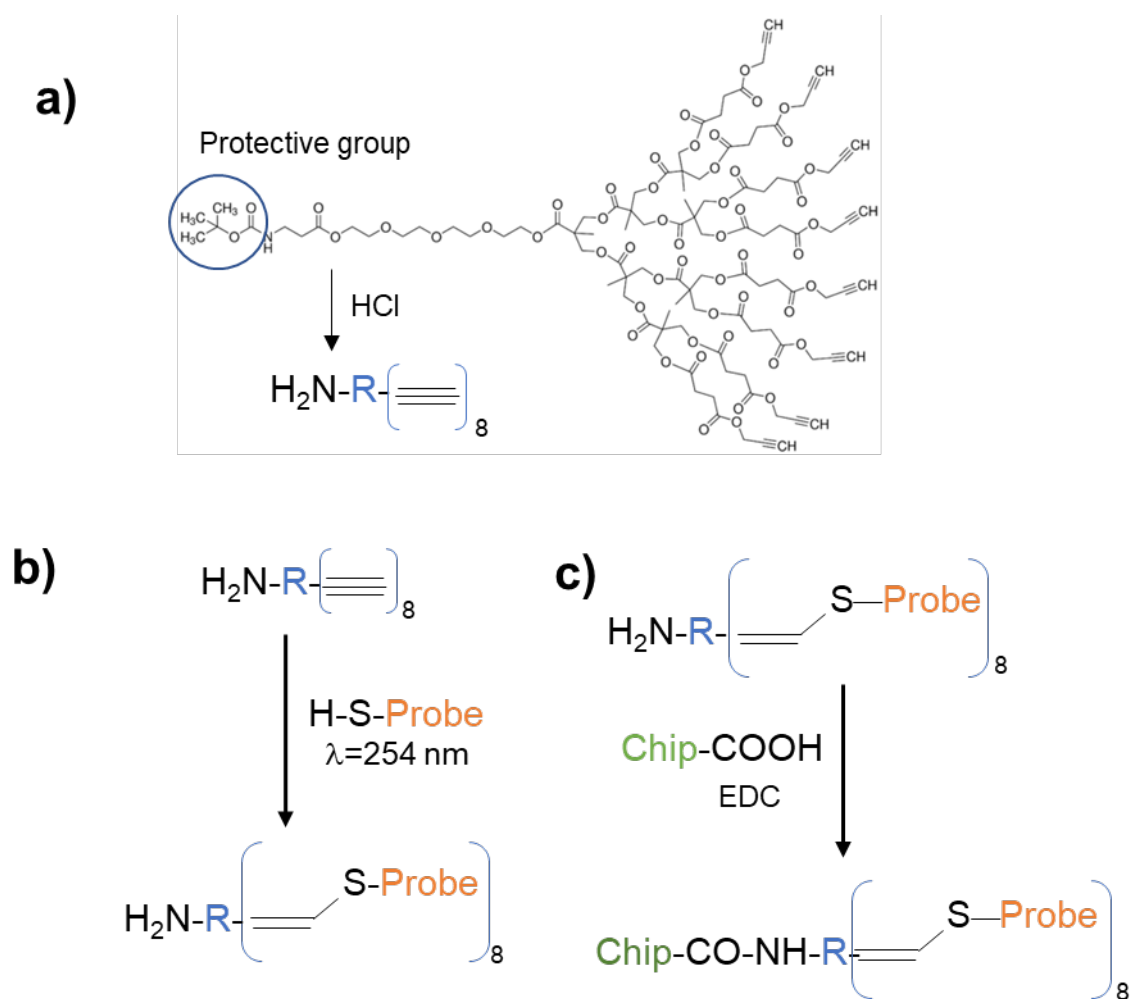

**Fig. S1:** Dendron-mediated chemistry applied to the DNA-probe immobilization on polycarbonate planar surfaces. **a)** Dendron structure with amine-apex protected by tert-butyl-oxycarbonyl. The deprotection is a carbamate hydrolysis in acidic conditions. **b)** Conjugation to eight thiol-probes by photoclick-chemistry of thiol-yne **c)** Chip immobilization based on carbodiimide reaction mediated by 1-ethyl-3-(3-dimethyl aminopropyl)carbodiimide (EDC); R: dendron, R': probe, R'': activated chip surface.

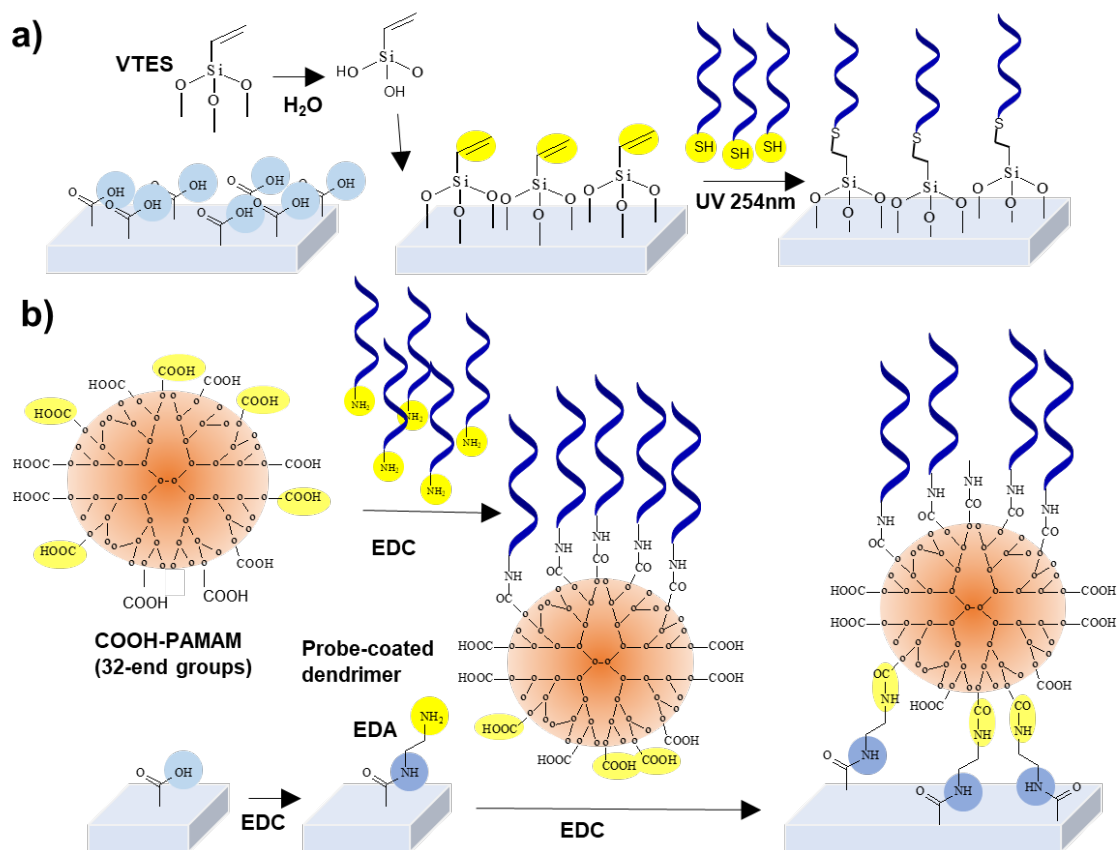

**Fig. S2:** Reference probe immobilization on polycarbonate surfaces. **a)** VTES-mediated attachment based on the silanization of activated polycarbonate and thiol-ene click chemistry. **b)** Dendrimer-mediated attachment based on carbodiimide chemistry.

VTES chips (Thiol-reaction). Thiol-probes were grafted on activated plastic chips by thiol-ene click chemistry reaction. After photo-activation, a solution of vinyltriethoxysilane (VTES, Sigma Aldrich) at 3% in isopropanol was incubated for 1 h at room temperature. Chips were washed several times with isopropanol, air-dried, and heated at 110 °C for 1 h. Thiol-DNA probe (SH-C<sub>6</sub>-T<sub>10</sub>-ATGATGCACGTCATGGTGGC) in PBS buffer was dispensed on the activated surface (40 nL). Finally, chips were irradiated for 30 s by UV-ozone at 254 nm, washed, and air-dried.

EDA/COOH-PAMAM chips. Amine functionalized dendrimers (COOH-PAMAM dendrimer, generation 3.5, Sigma Aldrich) were immobilized in the active amine-plastic chip. The activation treatment of chips consisted of incubating a solution of ethylenediamine (EDA) at 1% and 1-ethyl-3-(3-dimethyl aminopropyl)carbodiimide (EDC) at 50 mM. The incubation was for 30 min at room temperature. Later, chips were immersed in 70% ethanol solution and dried. Meanwhile, the mixtures of dendrimer (10 nM), NH<sub>2</sub>-oligonucleotide probes (200 nM), and EDC (50 mM) were incubated in the printing solution at room temperature for 30 min with end-over rotation. After DNA-dendrimer coupling, solutions were arrayed on EDA-functionalized surfaces (40 nL). Finally, chips were washed and air-dried.

Reference: Martorell, S., Tortajada-Genaro, L. A., González-Martínez, M. A., & Maquieira, A. (2021). Surface coupling of oligo-functionalized dendrimers to detect DNA mutations after blocked isothermal amplification. *Microchemical Journal*, 106546.

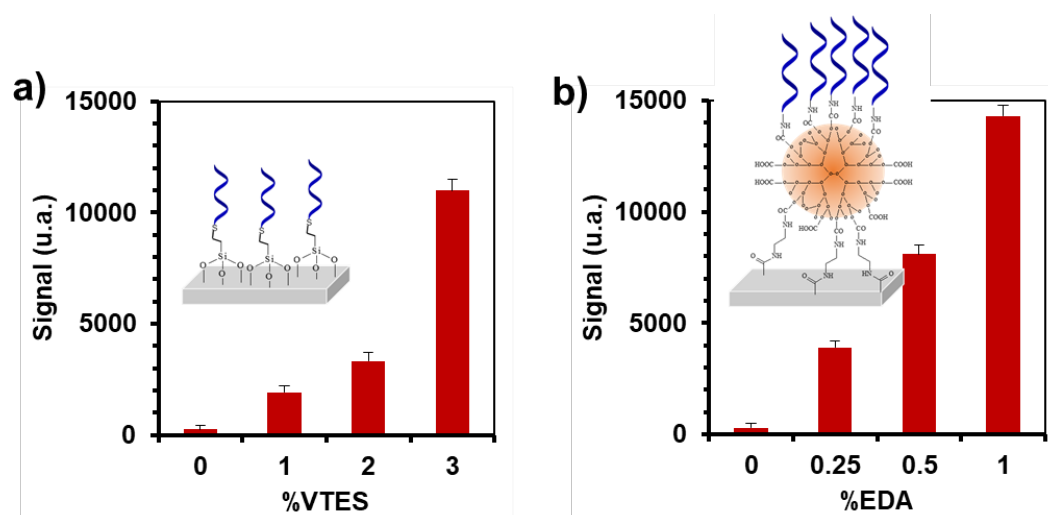

**Fig. S3:** Spot signal of hybridization assay depending on the crosslinker concentration in reference chips. **a)** VTES-mediated chemistry. **b)** Dendrimer-mediated chemistry.

**Table S1.** Comparison of dendrimer-mediated and dendron-mediated methods for the immobilization of probes. a) Protocol. b) Performances.

| a)                     | Dendrimer method                                                                  | Dendron method                                                                      |
|------------------------|-----------------------------------------------------------------------------------|-------------------------------------------------------------------------------------|
| <b>Nanomaterial</b>    |                                                                                   |                                                                                     |
| Structure              | 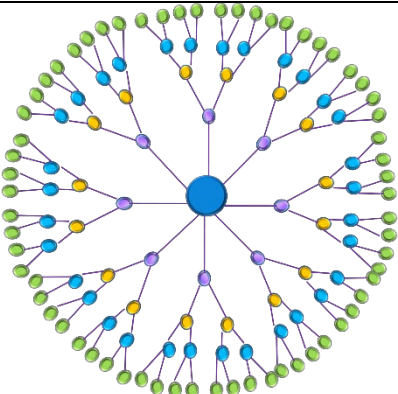 |  |
| Width                  | 4.5 nm                                                                            | 2.4 nm                                                                              |
| Height                 | 4.5 nm                                                                            | 4.7 nm                                                                              |
| Terminal groups        | 64 groups: -COOH                                                                  | 8 groups: -C≡CH<br>1 group: -NH <sub>2</sub>                                        |
| <b>Probe-coupling</b>  |                                                                                   |                                                                                     |
| Mechanism              | Carbodiimide reaction                                                             | Photochemistry                                                                      |
| Conditions             | EDC 50 mM<br>30 min                                                               | Reagent free<br>Light 254 nm, 30 s                                                  |
| Concentrations         | Dendrimer 10 nM<br>NH <sub>2</sub> -probe 200 nM                                  | Dendron 5 nM<br>HS-probe 50 nM                                                      |
| <b>Chip-coupling</b>   |                                                                                   |                                                                                     |
| Mechanism              | Carbodiimide reaction through a crosslinker<br>Photo-activation                   | Direct carbodiimide reaction<br>Photo-activation                                    |
| Chip activation        | Light 254 nm, 10 min<br>NaOH, 30 min, 60 °C<br>EDA-functionalized                 | Light 254 nm, 10 min<br>NaOH, 30 min, 60 °C                                         |
| Chip treatment         | EDA 1%, EDC 50 mM<br>30 min, 37 °C                                                | -                                                                                   |
| Conjugate dispensation | Spotting 40 nL                                                                    | Spotting 30 nL                                                                      |
| Conditions             | EDC 50 mM, MES 0.1 M<br>60 min                                                    | EDC 50 mM, MES 0.1 M<br>60 min                                                      |
| <b>(b)</b>             |                                                                                   |                                                                                     |
|                        | Dendrimer method                                                                  | Dendron method                                                                      |
| Nanomaterial cost      | ✓                                                                                 |                                                                                     |
| Other reagents cost    |                                                                                   | ✓                                                                                   |
| Probe consumption      |                                                                                   | ✓                                                                                   |
| Probe coupling         |                                                                                   | ✓                                                                                   |
| Chip treatment         |                                                                                   | ✓                                                                                   |
| Chip coupling          |                                                                                   | ✓                                                                                   |
| Effect on RPA method   | ✓                                                                                 | ✓                                                                                   |
| Background signal      |                                                                                   | ✓                                                                                   |
| Analyte signal         | ✓                                                                                 | ✓                                                                                   |

✓ Best performing

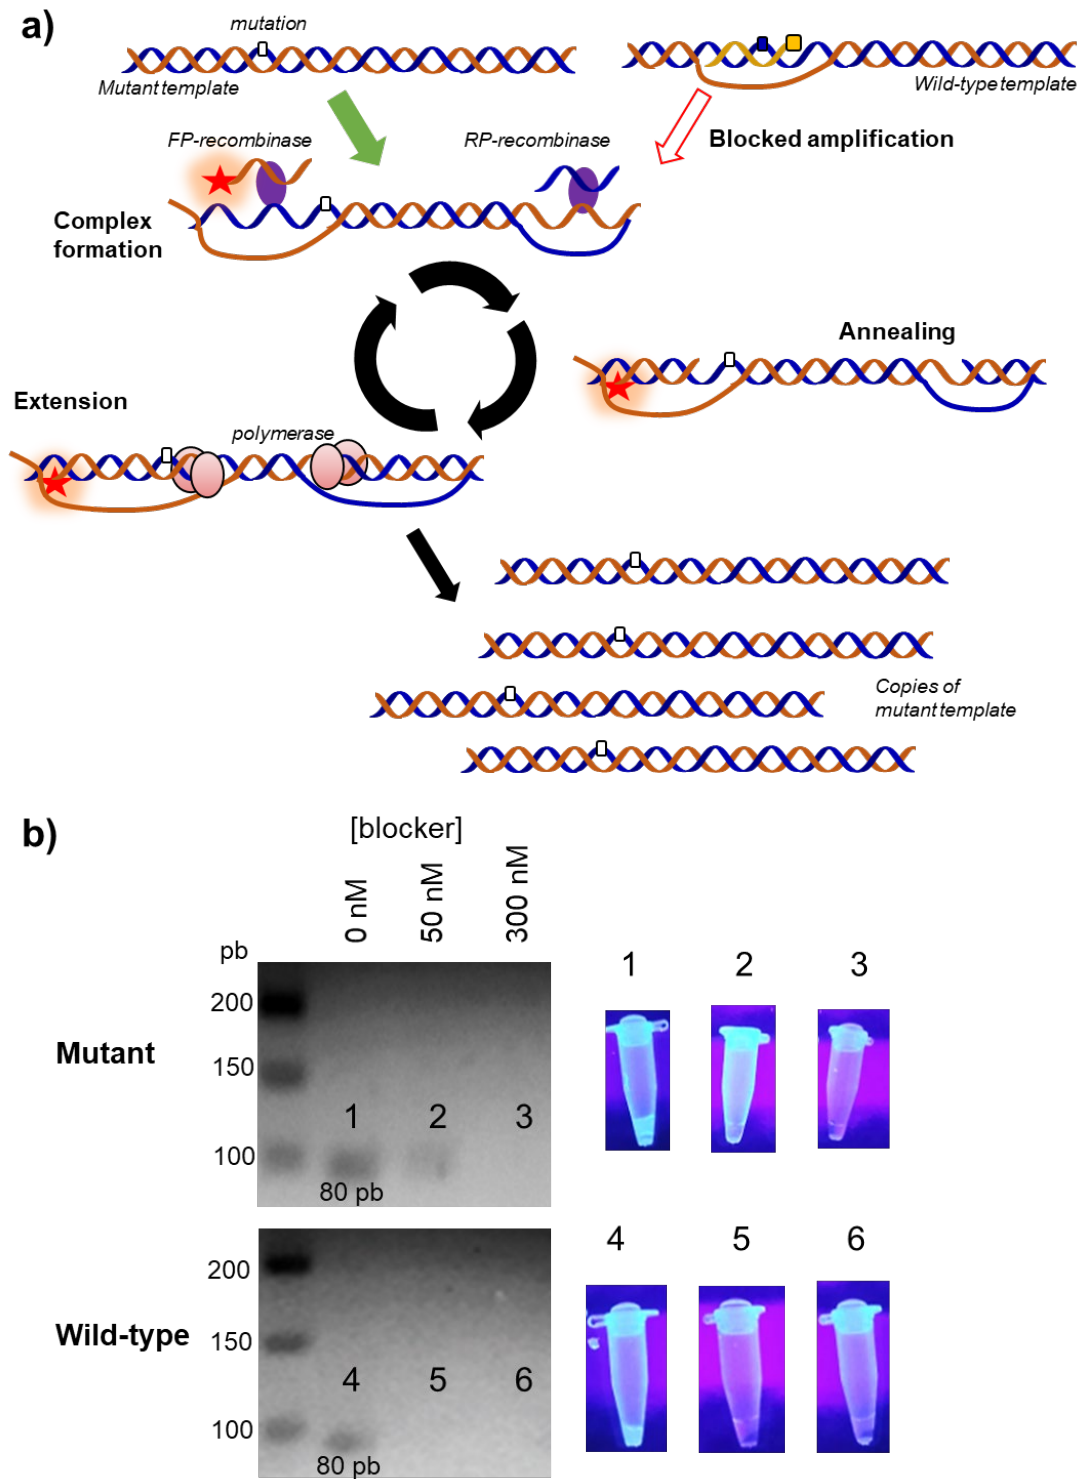

**Fig. SI.4:** Blocked-RPA. a) Amplification mechanism. b) Gel electrophoresis and direct fluorescent measurement by SYBR safe as a staining agent. Conditions: Agarose 3%, separation at 110 V. Samples: HCT116 cell line (*PIK3CA* gene, c.3140A>G) and SK-N-AS cell line (wild-type).

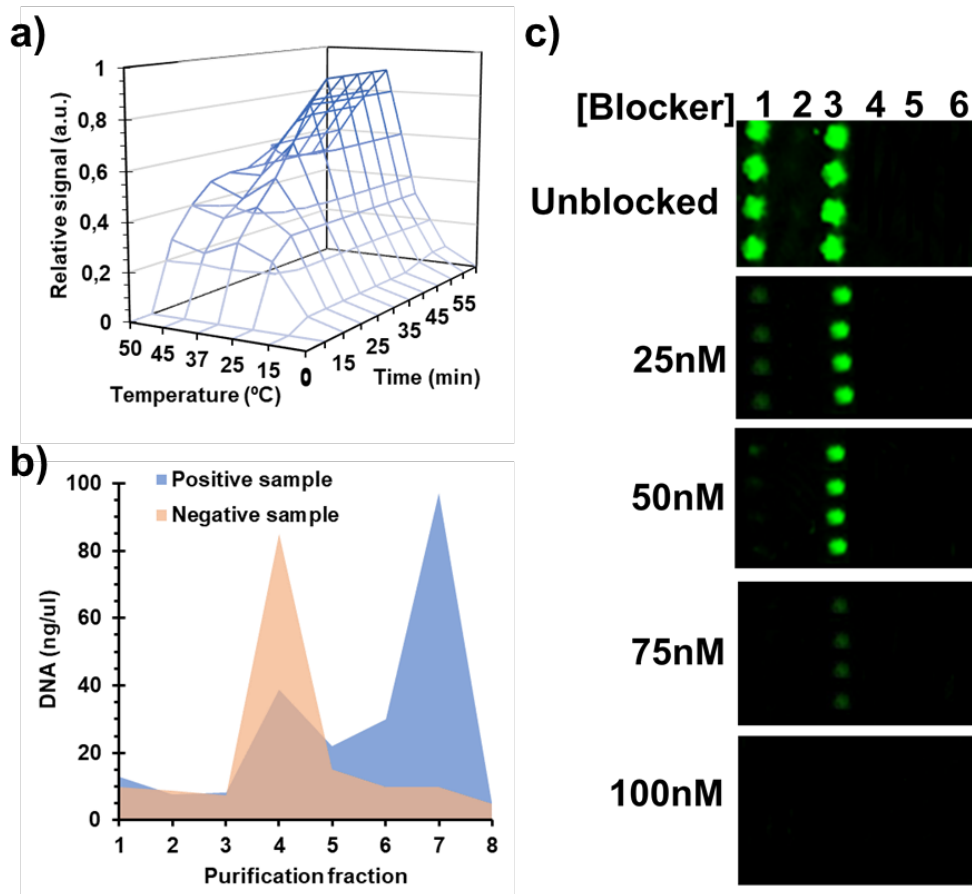

**Fig. SI.5:** Study of blocked-RPA conditions: **a)** Effect of working temperature and reaction time on the registered signal. **b)** Separation profile of RPA products using a silica-membrane system (Jena Bioscience). DNA concentrations were determined by the NanoDrop instrument (Thermo Scientific). Fraction 4 corresponded to the excess primer (single-strand DNA) and fraction 7 to RPA product (double-strand DNA). **c)** Array images for different amounts of blocking agent (probes: 1. Wild-type (C); 2: mutant 1 (A); 3: mutant 2 (G); 4: mutant 3 (T); 5: negative control 1; 6: negative control 2). Sample: CRC cell line HCT116 with heterozygous H1047R mutation.



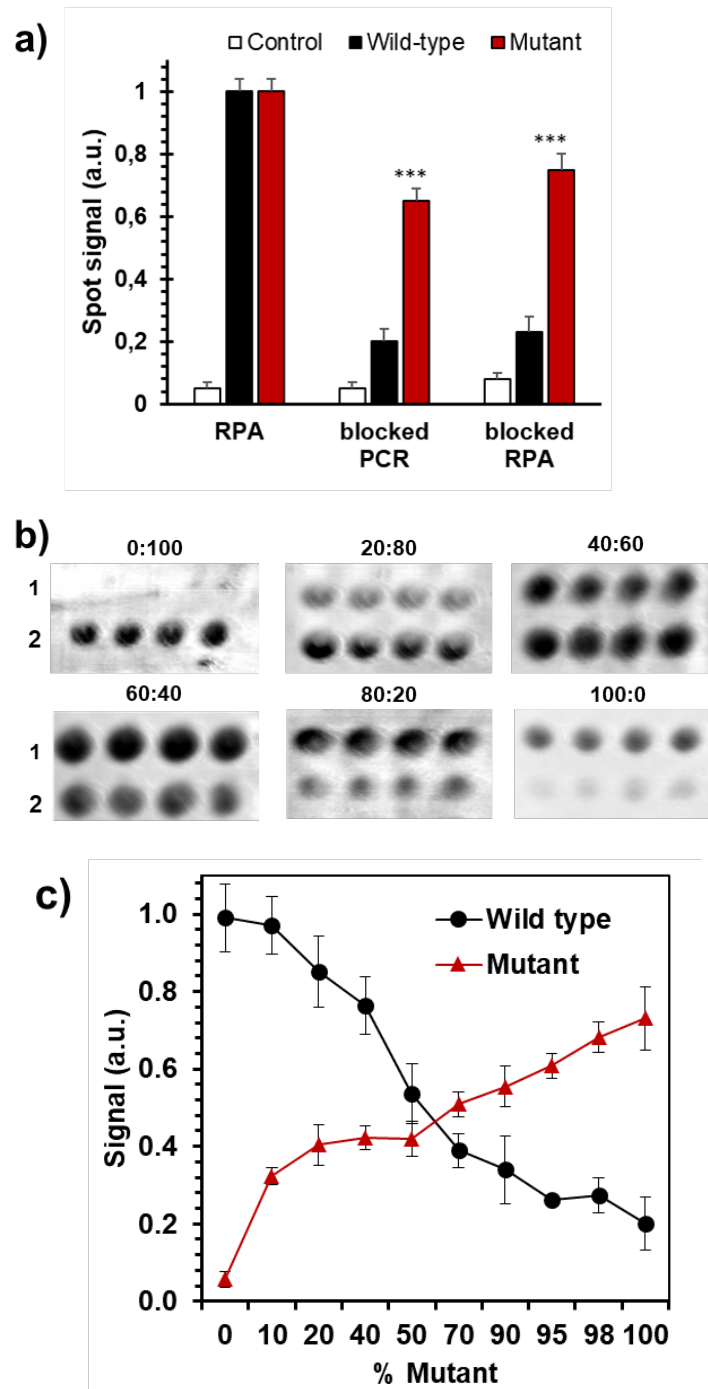

**Fig. S6:** Mixes of wild-type and mutant genomes. **a)** Comparison of amplification techniques. **b)** Capture-array image of hybridization mixes varying initial percentages (wild-type:mutant). **b)** Spot signal registered for wild-type and mutant probes depending on mutant percentage in the genome mixture.

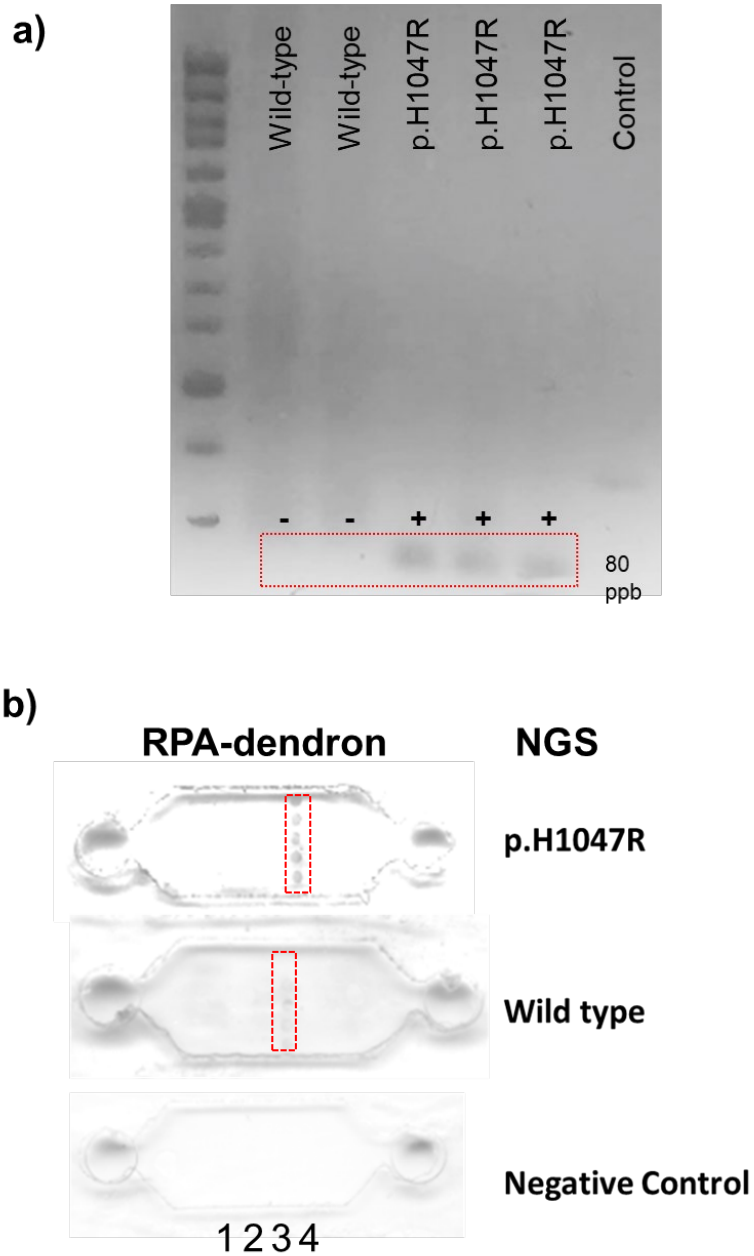

**Fig. S7:** Analysis of patient samples for genotyping of *PIK3CA* gene based on blocked-RPA and hybridization on dendron-polymer chip. a) Gel electrophoresis: agarose 3%, separation at 110 V. b) Images of chips, compared to the next-generation sequencing (NGS) results. 1: Probe A, 2: Probe C, 3: Probe A, and 4: Probe G.
